# Supplementary material for: Novel Lactic Acid Bacteria Strains from Regional Peppers with Health-Promoting Potential
Source: MDPI journal article supplement (doi:10.3390/fermentation10040209), 2024-04-11
Supplement: s1 [file s1]

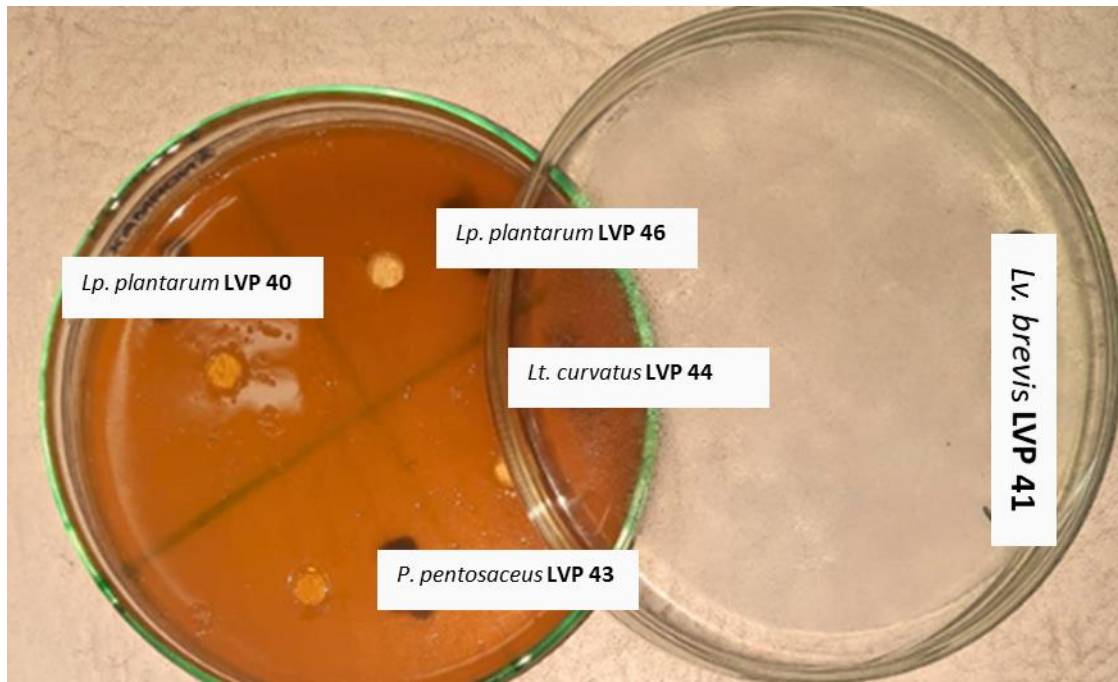

**Figure S1.** Strain Compatibility Assessment. The agar diffusion method was employed. The cell concentration of the indicator strain was 108 CFU/mL (grass strain), and 30  $\mu$ L of the cell-free supernatant culture of other strains was added to the wells. Incompatibility between strains is evidenced by halos of inhibition surrounding the well. In the example, the *Lv. brevis* LVP 41 grass and the supernatant of the other bacteria are observed.

*Lp. plantarum* LV P40

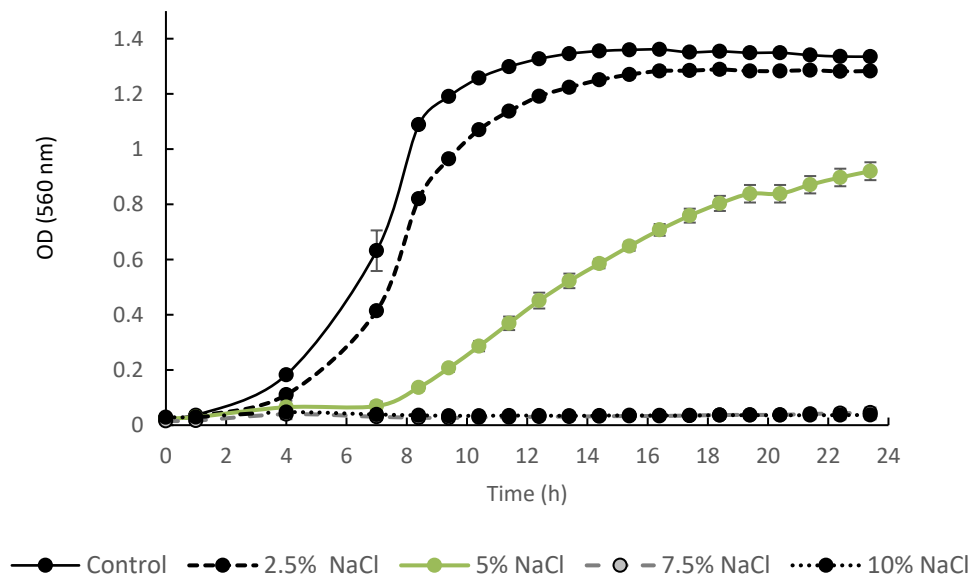

*Lv. brevis* LV P41

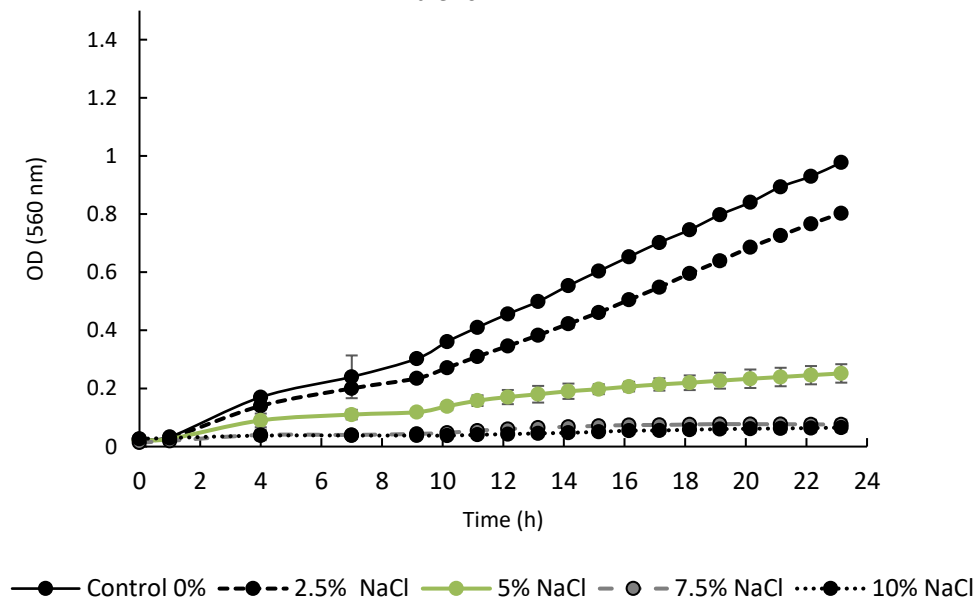

*P. pentosaceus* LV P43

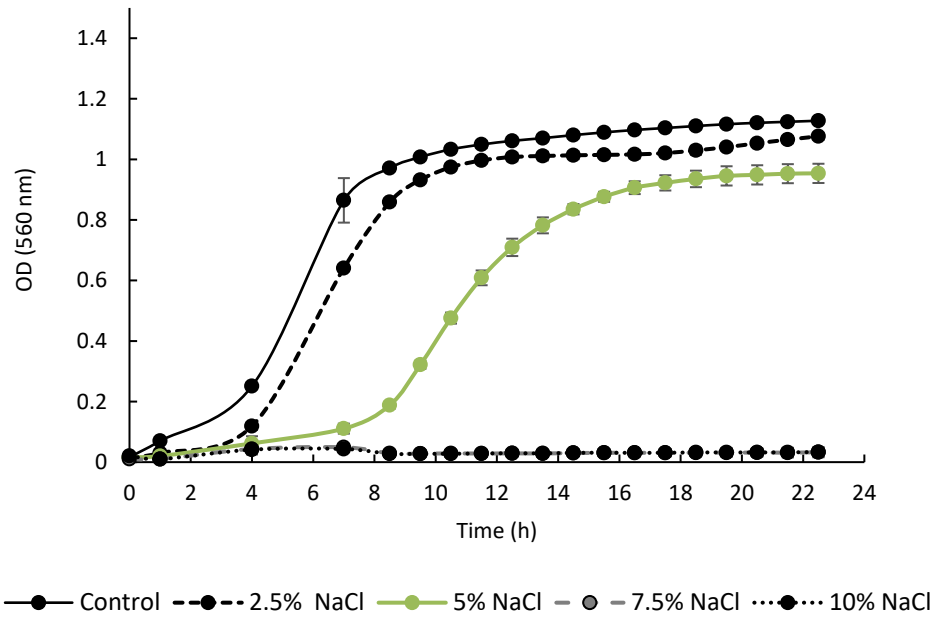

*Lt. curvatus* LVP 44

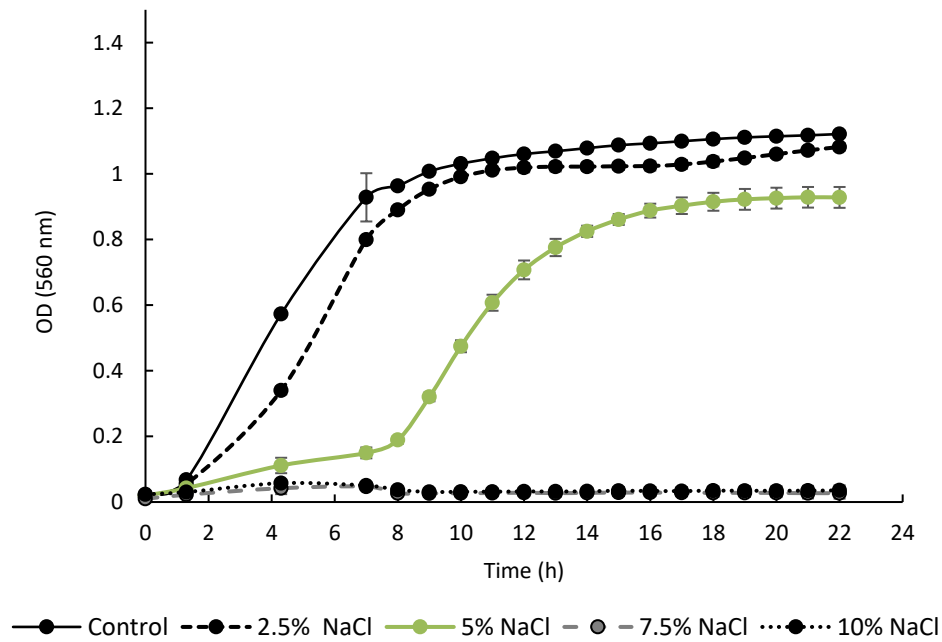

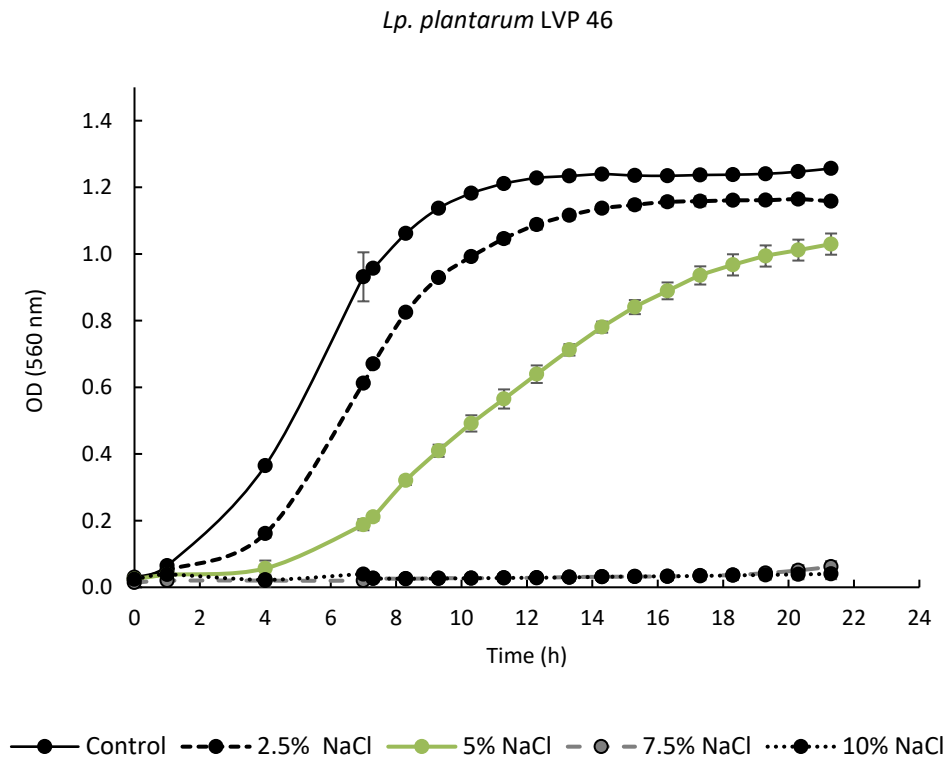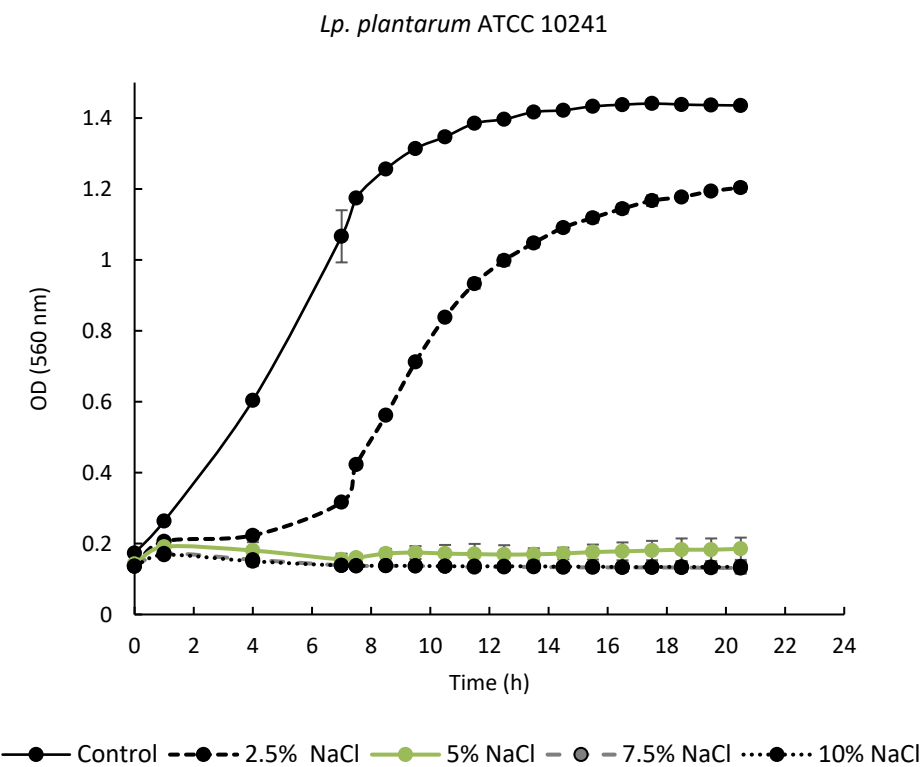

**Figure S2.** Growth curves of lactic acid bacteria in the absence and presence of different NaCl concentrations.
