# Supplementary material for: Novel Lactic Acid Bacteria Strains from Regional Peppers with Health-Promoting Potential
Source: MDPI journal article supplement (doi:10.3390/fermentation10040209), 2024-04-11
Supplement: s1 [file s1]

Archive with 1 entries (1 files):
- fermentation-2920664-supplementary.pdf
